# Supplementary material
Source: Springer Nature journal article supplement (https://www.springermedizin.de/resource/supplementary/12873_2008_66_MOESM3_ESM.pdf/9431894)
Supplement: MOESM3 [file 9431894]

**Table 3. Predictors for discharging patients from pre-hospital levels without further transferral: logistic regression**

| From the ambulances              |                 | n          | Crude effect       |           |            | Adjusted effect |           |         |
|----------------------------------|-----------------|------------|--------------------|-----------|------------|-----------------|-----------|---------|
|                                  |                 |            | OR                 | 95% CI    | p-value    | OR              | 95% CI    | p-value |
| Gender                           | Male            | 1119       | Reference category |           |            |                 |           |         |
|                                  | Female          | 726        | <b>0.6</b>         | 0.5–0.7   | < 0.001    | <b>0.9</b>      | 0.7–1.1   | 0.31    |
| Toxic agents                     | Other agents    | 658        | Reference category |           |            |                 |           |         |
|                                  | Ethanol         | 509        | <b>6.0</b>         | 4.3–8.5   | < 0.001    | <b>5.9</b>      | 4.1–8.3   | < 0.001 |
|                                  | Opiates         | 678        | <b>41.9</b>        | 29.9–58.8 | < 0.001    | <b>38.8</b>     | 25.4–59.1 | < 0.001 |
| Consciousness                    | Awake           | 934        | Reference category |           |            |                 |           |         |
|                                  | Somnolent       | 426        | <b>1.0</b>         | 0.8–1.3   | 0.9        | <b>0.4</b>      | 0.3–0.6   | < 0.001 |
|                                  | Comatose        | 181        | <b>1.4</b>         | 1.0–1.9   | 0.06       | <b>0.2</b>      | 0.1–0.3   | < 0.001 |
|                                  | Deeply comatose | 304        | <b>2.9</b>         | 2.2–3.8   | < 0.001    | <b>0.1</b>      | 0.1–0.3   | < 0.001 |
| Respiratory depression or arrest | 380             | <b>5.5</b> | 4.3–7.0            | < 0.001   | <b>3.0</b> | 1.8–4.7         | < 0.001   |         |
| Antidote                         | Naloxone        | 507        | <b>6.5</b>         | 5.2–8.2   | < 0.001    | <b>2.0</b>      | 1.2–3.2   | 0.005   |
| Age                              | <30             | 582        | Reference category |           |            |                 |           |         |
|                                  | 30-49           | 875        | <b>1.1</b>         | 0.9-1.4   | 0.4        | <b>0.8</b>      | 0.6-1.1   | 0.15    |
|                                  | 50-69           | 266        | <b>0.4</b>         | 0.3-0.6   | <0.001     | <b>0.6</b>      | 0.4-0.9   | 0.009   |
|                                  | >70             | 55         | <b>0.6</b>         | 0.3-1.1   | 0.07       | <b>1.1</b>      | 0.6-2.3   | 0.75    |
|                                  | Age missing     | 67         | <b>2.5</b>         | 1.5-4.3   | 0.001      | <b>3.2</b>      | 1.6-6.2   | 0.001   |
| Total*                           | 1845            |            |                    |           |            |                 |           |         |
| From the outpatient clinic       |                 | n          | OR                 | 95% CI    | p-value    | OR              | 95% CI    | p-value |
| Gender                           | Male            | 647        | Reference category |           |            |                 |           |         |
|                                  | Female          | 309        | <b>0.6</b>         | 0.5–0.9   | 0.02       | <b>0.8</b>      | 0.5–1.3   | 0.3     |
| Toxic agents                     | Other agents    | 277        | Reference category |           |            |                 |           |         |
|                                  | Ethanol         | 207        | <b>7.9</b>         | 5.1–12.1  | < 0.001    | <b>8.1</b>      | 5.1–12.9  | < 0.001 |
|                                  | Opiates         | 472        | <b>5.9</b>         | 3.4–10.0  | < 0.001    | <b>12.6</b>     | 6.3–25.0  | < 0.001 |
| Consciousness                    | Awake           | 322        | Reference category |           |            |                 |           |         |
|                                  | Somnolent       | 510        | <b>1.2</b>         | 0.8–1.9   | 0.3        | <b>0.8</b>      | 0.5–1.3   | 0.3     |
|                                  | Comatose        | 112        | <b>0.4</b>         | 0.2–0.6   | < 0.001    | <b>0.2</b>      | 0.1–0.4   | < 0.001 |
|                                  | Deeply comatose | 12         | <b>0.1</b>         | 0.0–0.2   | < 0.001    | <b>0.04</b>     | 0.0–0.2   | < 0.001 |
| Respiratory depression           | 53              | <b>0.3</b> | 0.2–0.6            | 0.001     | <b>0.3</b> | 0.2–0.8         | 0.008     |         |
| Antidote                         | Naloxone        | 55         | <b>0.3</b>         | 0.2–0.5   | < 0.001    | <b>0.5</b>      | 0.3–1.2   | 0.1     |
| Total                            | 956             |            |                    |           |            |                 |           |         |

OR = Odds ratio for being discharged from pre-hospital levels

Adjusted effect: multivariate analysis including all variables shown in the tables, separately analysed for the ambulance and outpatient clinic patients

\*Patients who died in the ambulances were excluded (n = 15)
